# Supplementary material
Source: PubMed Central journal article supplement (PMC7800733)
Supplement: Malmartel_Supp_Table.pdf [file Malmartel_Supp_Table.pdf]

**Supplemental material for:**

Serbrouchni S, Malmartel A. Diagnostic agreement between telemedicine on social networks and teledermatology centers. *Ann Fam Med.* 2021;19(1):24-29.

**Supplemental Table 1: complete list of diagnoses**

|                                         | <b>Expert committee</b> | <b>Twitter and MedPics</b> | <b>Teledermatology services</b> |
|-----------------------------------------|-------------------------|----------------------------|---------------------------------|
| <b>Viral rash</b>                       | 4 (6.7%)                | 4 (6.7%)                   | 5 (8.3%)                        |
| <b>Eczema</b>                           | 4 (6.7%)                | 5 (8.3%)                   | 7 (11.7%)                       |
| <b>Mycosis</b>                          | 4 (6.7%)                | 6 (10.0%)                  | 6 (10.0%)                       |
| <b>Impetigo</b>                         | 2 (3.3%)                | 1 (1.7%)                   | 1 (1.7%)                        |
| <b>Photophytophthodermatosis</b>        | 1 (1.7%)                | 2 (3.3%)                   | -                               |
| <b>Non-tuberculous mycobacterium</b>    |                         | 1 (1.7%)                   | -                               |
| <b>Purpura</b>                          | 5 (8.3%)                | 4 (6.7%)                   | 4 (6.7%)                        |
| <b>Syphilis</b>                         | -                       | 1 (1.7%)                   | -                               |
| <b>Acrosyndrome</b>                     | -                       | -                          | 1 (1.7%)                        |
| <b>Sarcoids</b>                         | 1 (1.7%)                | 1 (1.7%)                   | 1 (1.7%)                        |
| <b>Non conclusive diagnosis</b>         | 4 (6.7%)                | 3 (5.0%)                   | 3 (5.0%)                        |
| <b>Granuloma annulare</b>               | -                       | 1 (1.7%)                   | -                               |
| <b>Drug allergy</b>                     | 1 (1.7%)                | 2 (3.3%)                   | 1 (1.7%)                        |
| <b>Scabies</b>                          | 1 (1.7%)                | 2 (3.3%)                   | -                               |
| <b>Herpes Labialis</b>                  | 3 (5.0%)                | 2 (3.3%)                   | 3 (5.0%)                        |
| <b>Hives</b>                            | 2 (3.3%)                | 2 (3.3%)                   | 2 (3.3%)                        |
| <b>Erythema migrans</b>                 | 3 (5.0%)                | 2 (3.3%)                   | 2 (3.3%)                        |
| <b>Psoriasis</b>                        | 1 (1.7%)                | 1 (1.7%)                   | 2 (3.3%)                        |
| <b>Vascularitis</b>                     | 1 (1.7%)                | 1 (1.7%)                   | 1 (1.7%)                        |
| <b>Prurigo</b>                          | -                       | 1 (1.7%)                   | 1 (1.7%)                        |
| <b>Lichen striatus</b>                  | 2 (3.3%)                | 2 (3.3%)                   | 1 (1.7%)                        |
| <b>Contact dermatitis</b>               | 1 (1.7%)                | 1 (1.7%)                   | -                               |
| <b>Morphea</b>                          | -                       | -                          | 1 (1.7%)                        |
| <b>Skin cancer</b>                      | 2 (3.3%)                | 1 (1.7%)                   | 1 (1.7%)                        |
| <b>Palmoplantar keratoderma</b>         | 2 (3.3%)                | 2 (3.3%)                   | 2 (3.3%)                        |
| <b>Lice and insect bites</b>            | 2 (3.3%)                | 2 (3.3%)                   | 3 (5.0%)                        |
| <b>Cushing syndrom</b>                  | -                       | 1 (1.7%)                   | -                               |
| <b>Polycythemia vera with erythrois</b> | -                       | -                          | 1 (1.7%)                        |
| <b>Larva migrans</b>                    | 1 (1.7%)                | -                          | 1 (1.7%)                        |
| <b>Ulcerative tonsilitis</b>            | -                       | 1 (1.7%)                   | 1 (1.7%)                        |
| <b>Livedo</b>                           | 1 (1.7%)                | 1 (1.7%)                   | 1 (1.7%)                        |
| <b>Pigmentogenic lichen</b>             | 1 (1.7%)                | 1 (1.7%)                   | 1 (1.7%)                        |
| <b>Chalazion</b>                        | 1 (1.7%)                | 1 (1.7%)                   | -                               |
| <b>Molluscum contagiosum</b>            | 1 (1.7%)                | 2 (3.3%)                   | 2 (3.3%)                        |
| <b>Herpes zoster</b>                    | 1 (1.7%)                | 1 (1.7%)                   | 1 (1.7%)                        |
| <b>Quincke's edema</b>                  | 1 (1.7%)                | -                          | -                               |
| <b>Flush</b>                            | 1 (1.7%)                | -                          | -                               |
| <b>Angina bullosa haemorrhagica</b>     | 1 (1.7%)                | -                          | -                               |
| <b>Linear IgA dermatosis</b>            | 1 (1.7%)                | -                          | 1 (1.7%)                        |
| <b>neutrophilic eccrine dermatosis</b>  | 1 (1.7%)                | -                          | -                               |
| <b>Lymphangitis</b>                     | 1 (1.7%)                | -                          | -                               |
| <b>Chickenpox</b>                       | 1 (1.7%)                | -                          | -                               |
| <b>Folliculitis</b>                     | 1 (1.7%)                | -                          | -                               |
| <b>Biopsy required for a diagnosis</b>  | -                       | 1 (1.7%)                   | 3(5.0%)                         |
